# Supplementary material
Source: publisher figshare collection journal article supplement (https://sage.figshare.com/ndownloader/files/36578577)
Supplement: Supplementary file 1 [file 36578577]

**Supplemental Table 1. Quality assessment of studies**

| **Authors, Year** | **Prospective Design** | **Standardized antiplatelet protocol** | **Standardized Follow-up** | **Complications individually reported** | **Angiographic outcomes reported** | **Total attributes*** |
| --- | --- | --- | --- | --- | --- | --- |
| Aguilar-Perez, et al.; 20201 | No | Yes | Yes | Yes | Yes | 4 |
| Goertz, et al.; 20192 | No | Yes | Yes | Yes | Yes | 4 |
| Guzzardi, et al.; 20203 | No | Yes | No | Yes | Yes | 3 |
| Kaschner, et al.; 20204 | No | Yes | Yes | Yes | Yes | 4 |
| Lobsien, et al.; 20215 | No | No | No | Yes | No | 1 |
| Manning, et al.;20196 | No | No | Yes | No | Yes | 2 |

**≤2 = low quality, 3 = moderate quality, ≥4 = high quality*

**References**

1. Aguilar-Perez M, Hellstern V, AlMatter M, et al. The p48 Flow Modulation Device with Hydrophilic Polymer Coating (HPC) for the Treatment of Acutely Ruptured Aneurysms: Early Clinical Experience Using Single Antiplatelet Therapy. *Cardiovasc Intervent Radiol* 2020; 43: 740-748. 2020/02/08. DOI: 10.1007/s00270-020-02418-4.
2. Goertz L, Dorn F, Kraus B, et al. Safety and efficacy of the Derivo Embolization Device for the treatment of ruptured intracranial aneurysms. *J Neurointerv Surg* 2019; 11: 290-295. 2018/08/08. DOI: 10.1136/neurintsurg-2018-014166.
3. Guzzardi G, Galbiati A, Stanca C, et al. Flow diverter stents with hydrophilic polymer coating for the treatment of acutely ruptured aneurysms using single antiplatelet therapy: Preliminary experience. *Interv Neuroradiol* 2020; 26: 525-531. 2020/08/18. DOI: 10.1177/1591019920950878.
4. Kaschner MG, Petridis A and Turowski B. Single-center experience with the new generation Derivo Embolization Device in ruptured dissecting and blister aneurysms. *Acta Radiol* 2020; 61: 37-46. 2019/06/06. DOI: 10.1177/0284185119852731.
5. Lobsien D, Clajus C, Behme D, et al. Aneurysm Treatment in Acute SAH with Hydrophilic-Coated Flow Diverters under Single-Antiplatelet Therapy: A 3-Center Experience. *AJNR Am J Neuroradiol* 2021; 42: 508-515. 2021/01/16. DOI: 10.3174/ajnr.A6942.
6. Manning NW, Cheung A, Phillips TJ, et al. Pipeline shield with single antiplatelet therapy in aneurysmal subarachnoid haemorrhage: multicentre experience. *J Neurointerv Surg* 2019; 11: 694-698. 2018/12/16. DOI: 10.1136/neurintsurg-2018-014363.


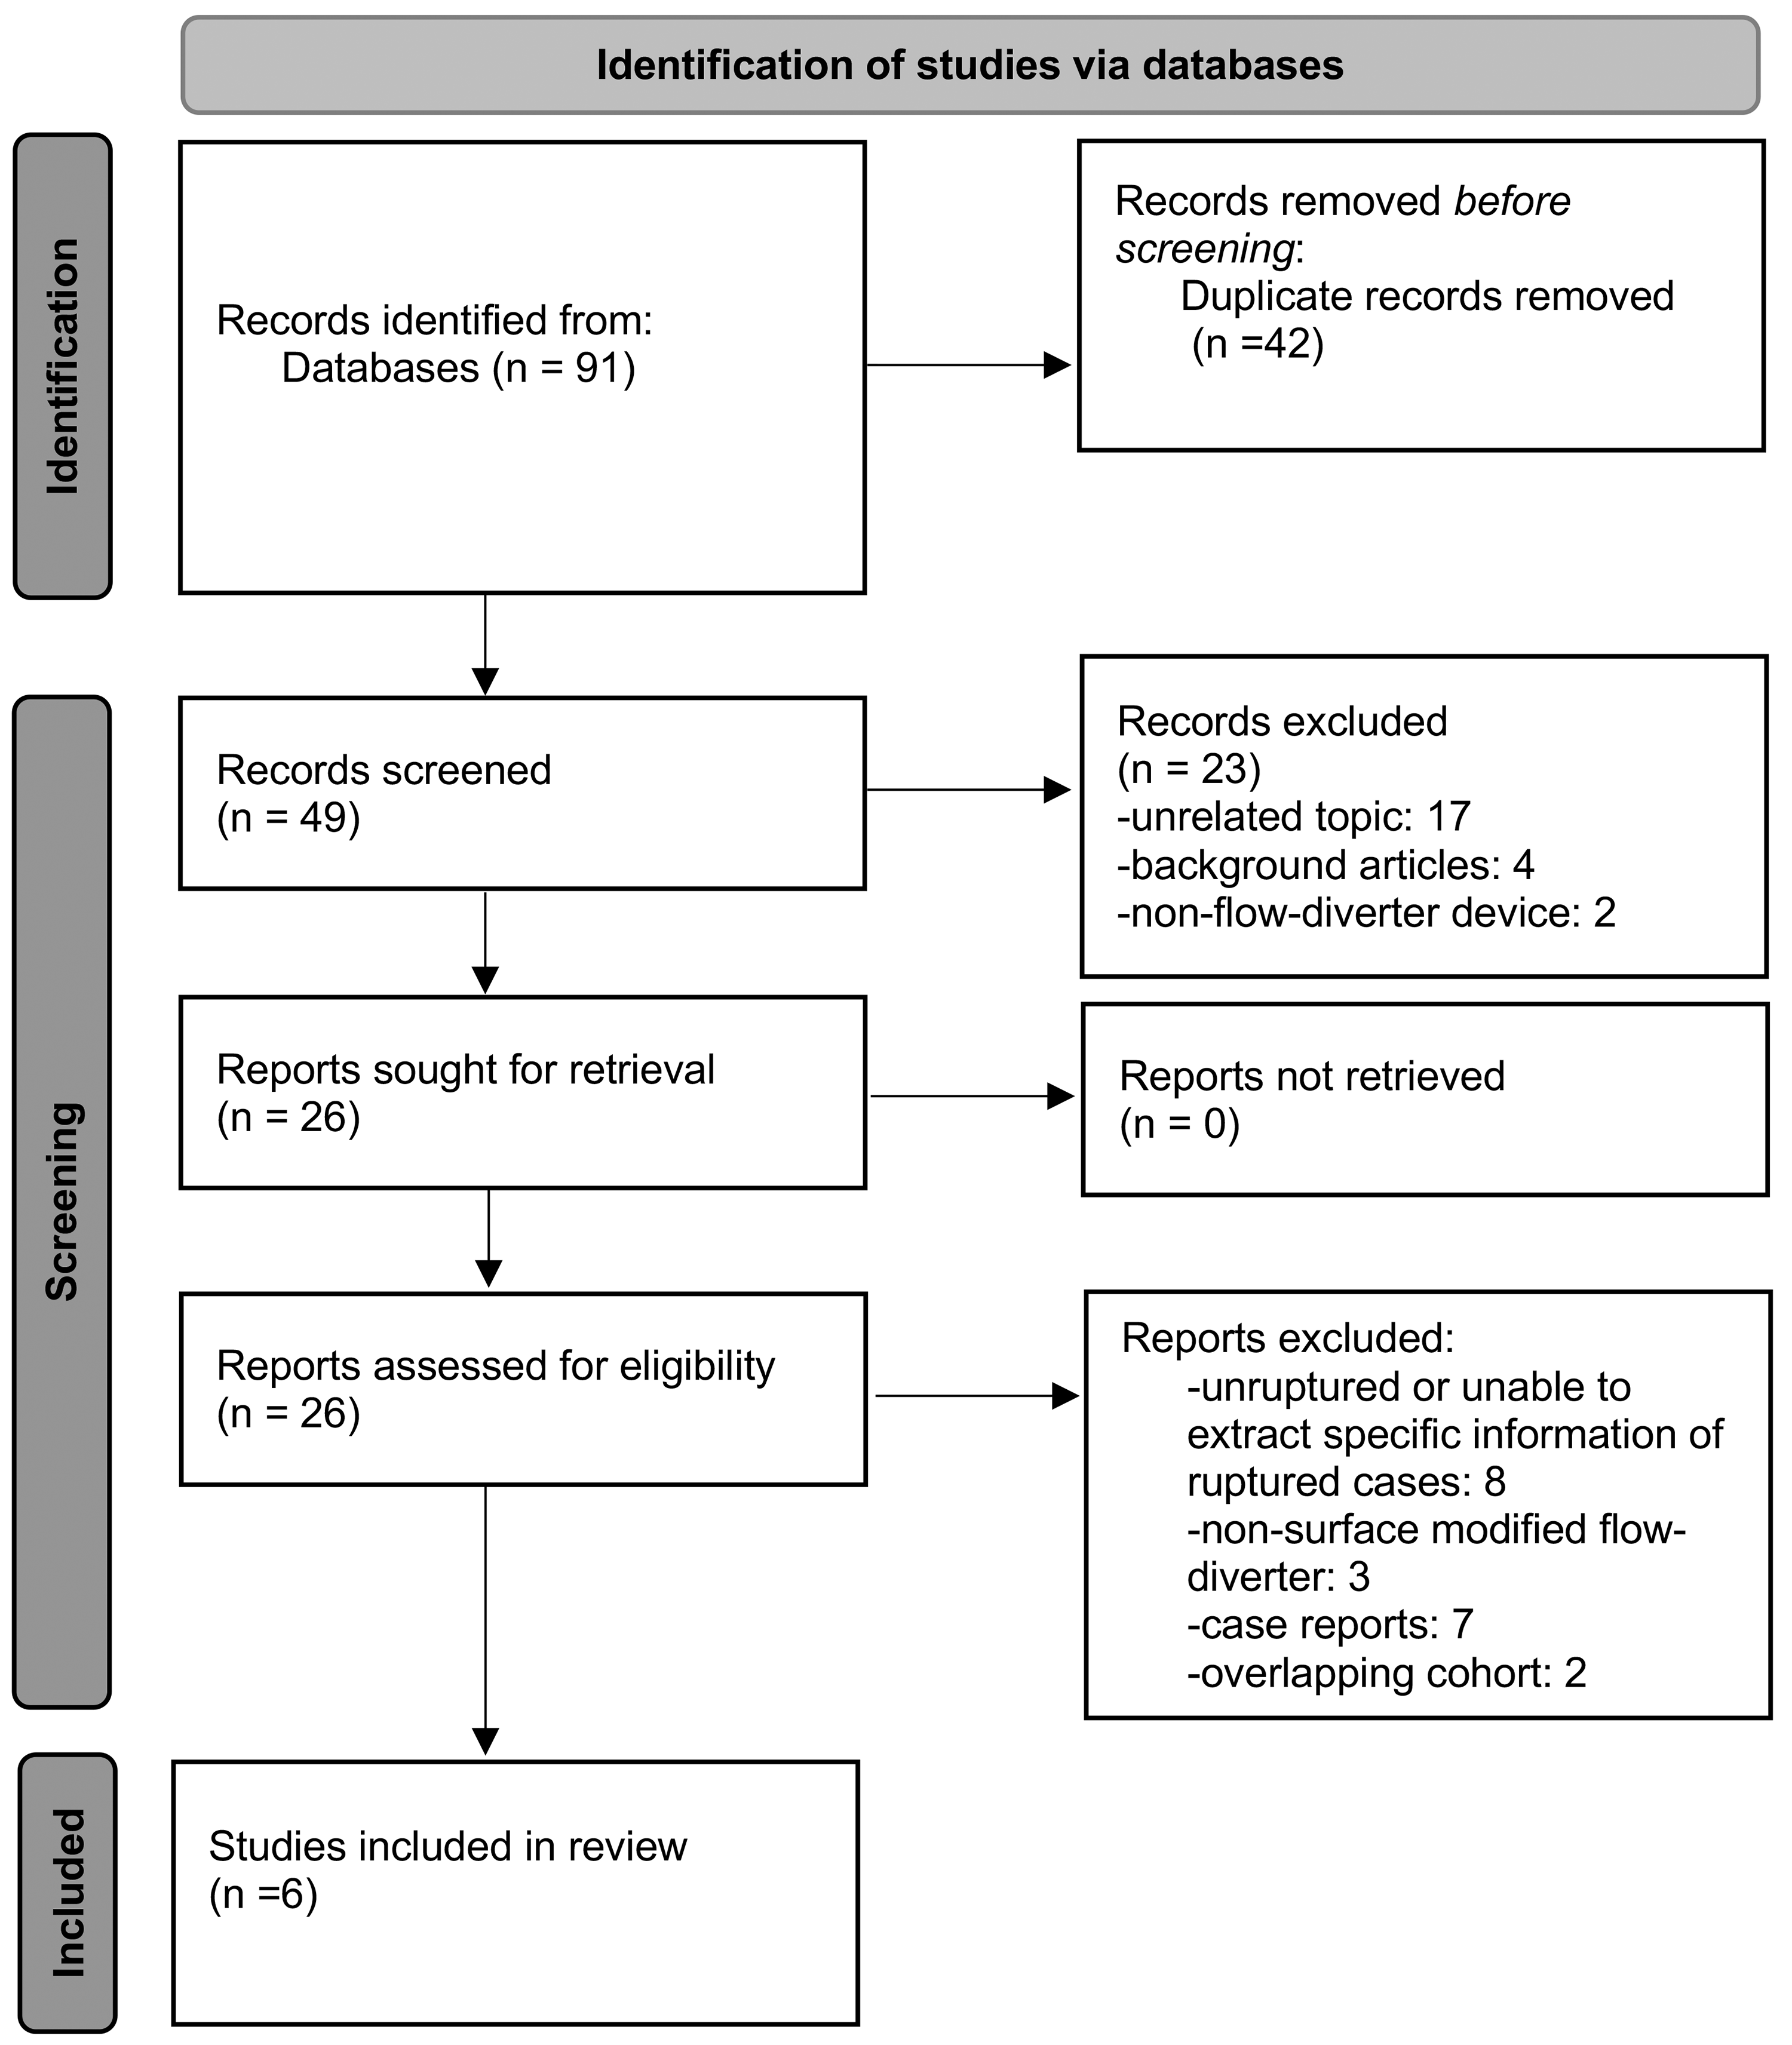


**Supplemental Fig 1**: Preferred Reporting Items in Systematic Reviews and Meta Analyses flow diagram demonstrating the selection process.


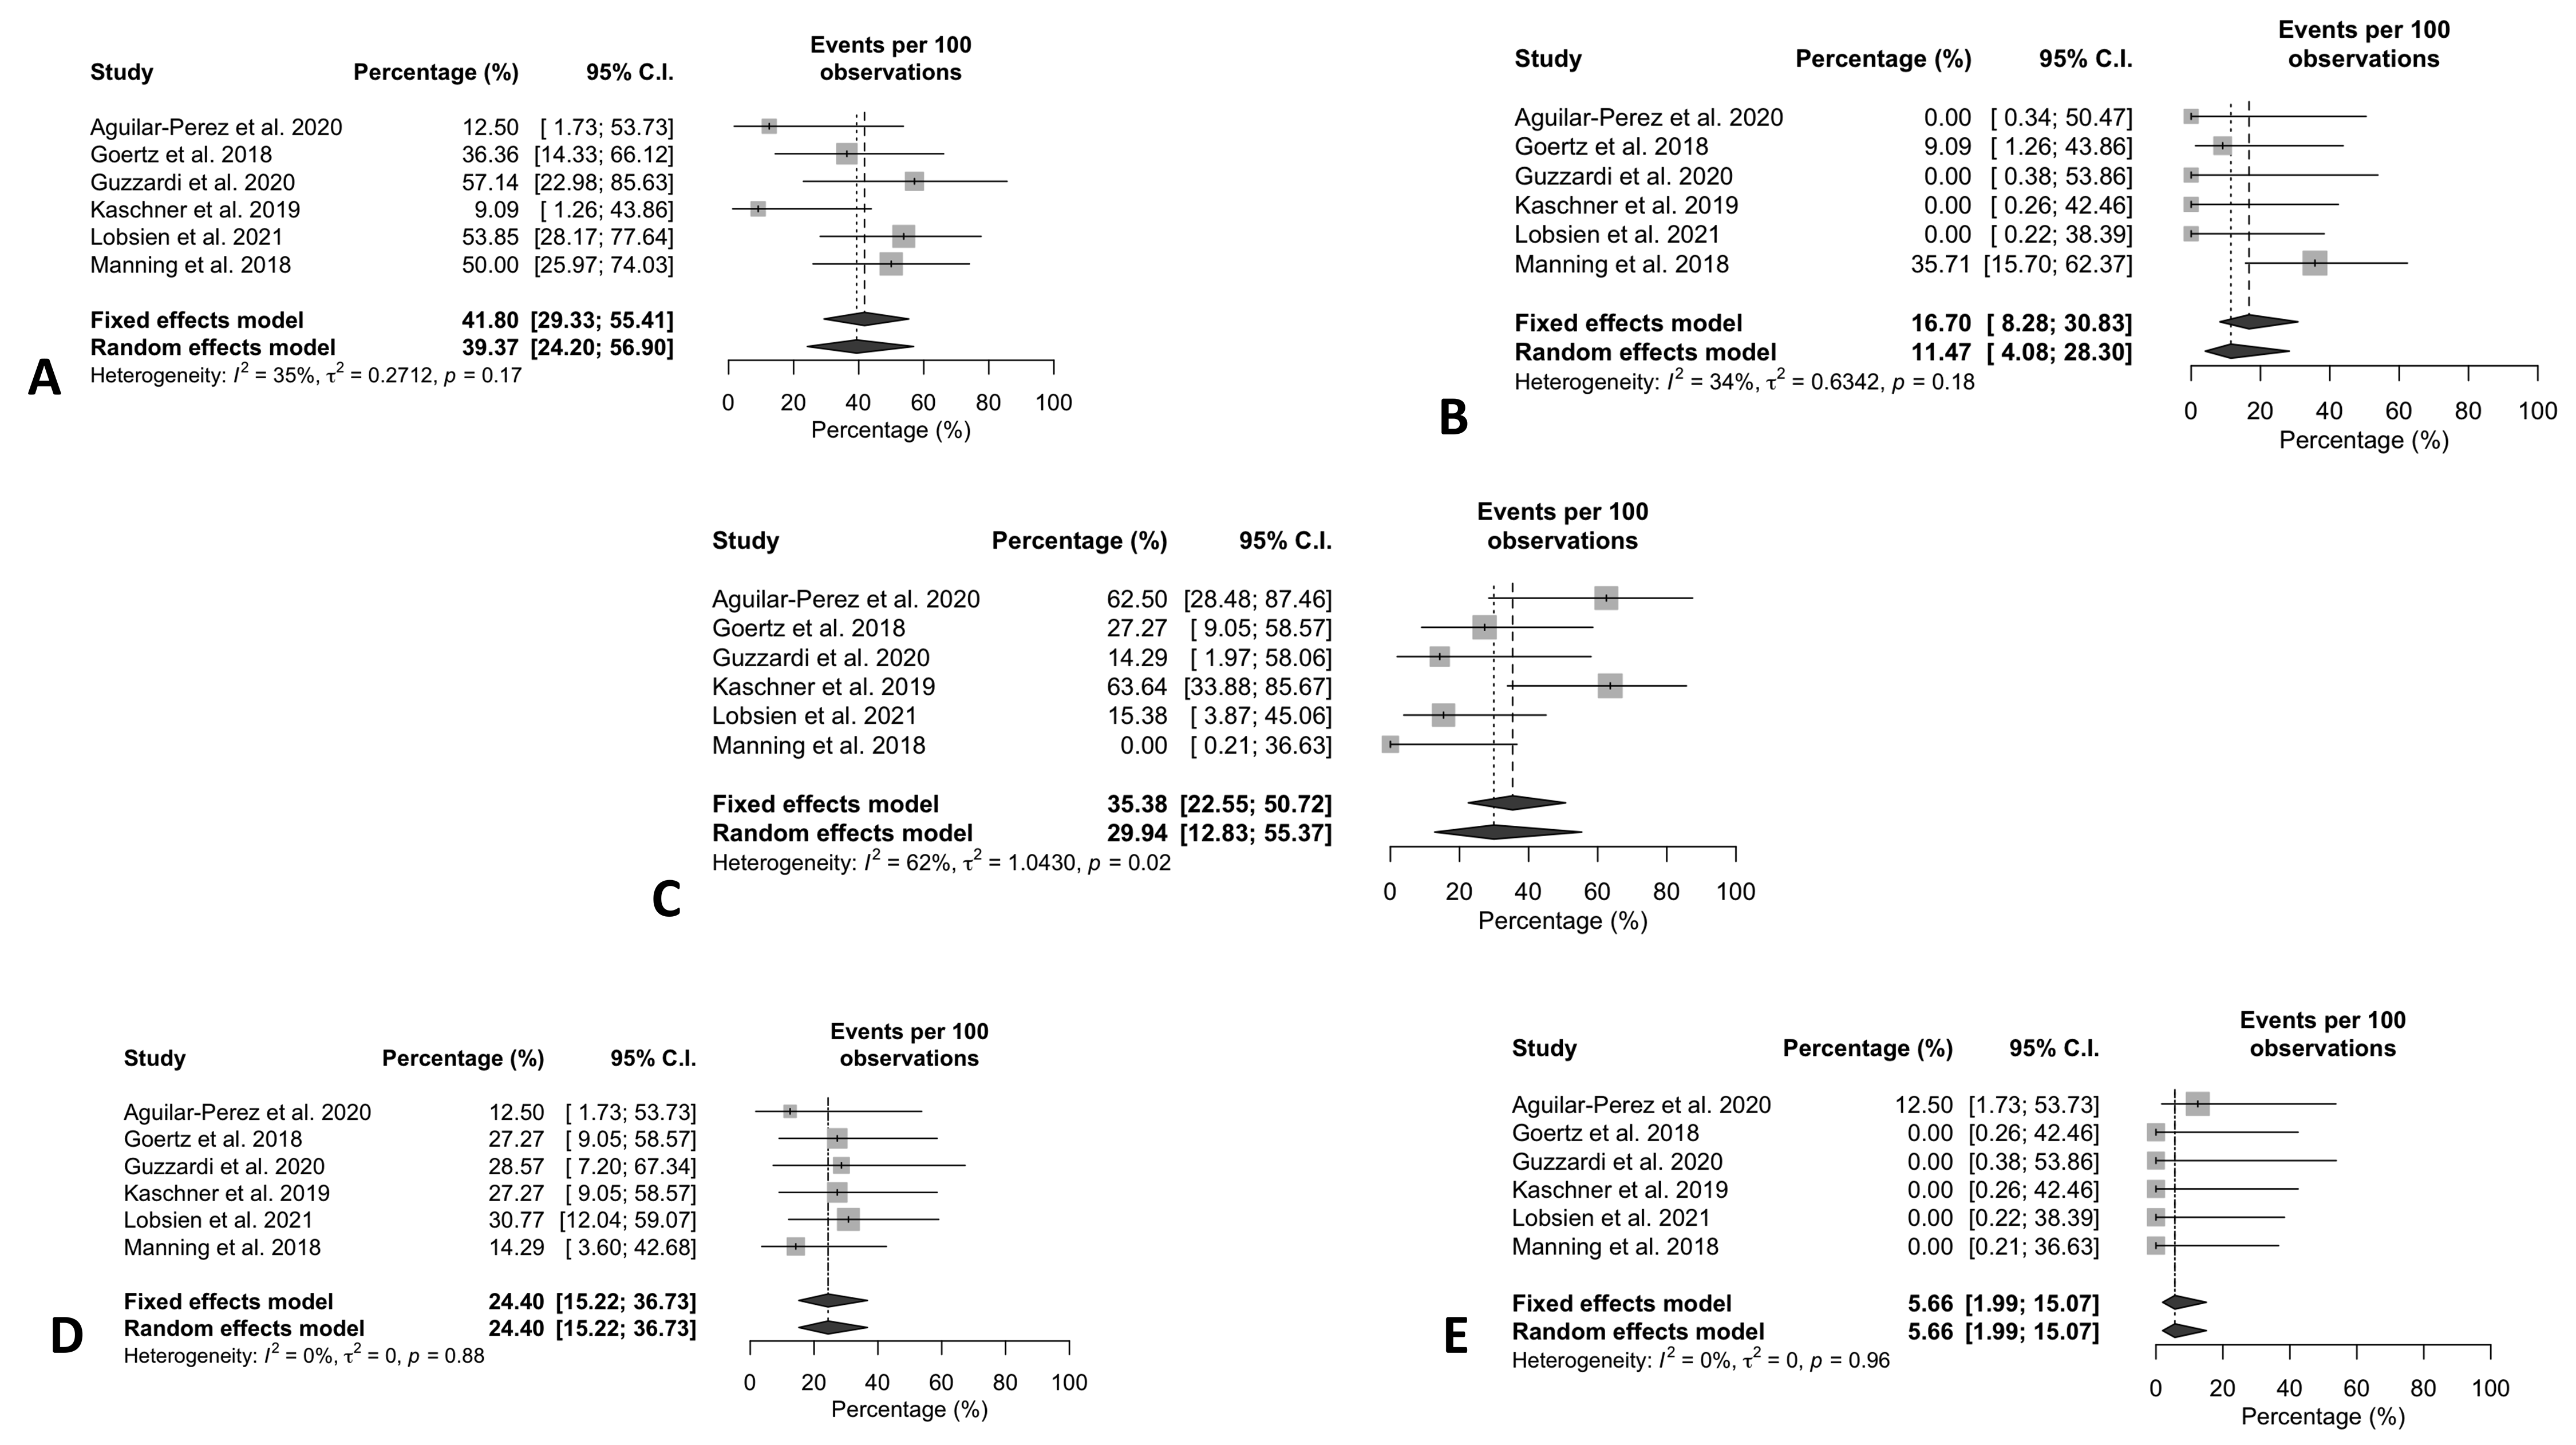


**Supplemental Fig 2**: Estimated weighted rates of saccular (A), fusiform (B), dissecting (C), blood blister (D), and mycotic (E) aneurysms.
